# Supplementary material
Source: PubMed Central journal article supplement (PMC3294449)
Supplement: supp_11.3.343_FigS1AB.pdf [file supp_11.3.343_FigS1AB.pdf]

# Figure S1

**A**

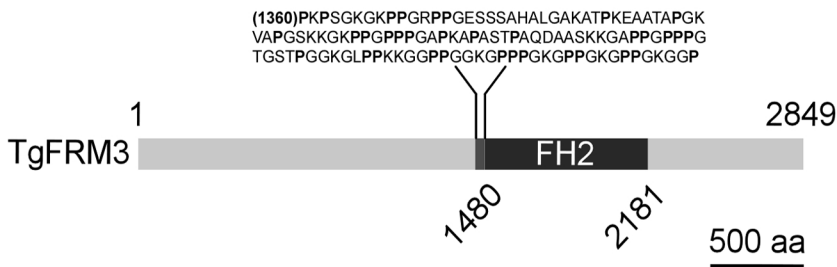

**B**

F1 (4582) -----K**KPEAPK**-----KEEA  
F2 (3317) -----TGSYPGASDKSQ**QTF**SAGAPSSGT**NARTES**T**P**PAGAGETGASGEAK  
F3 (1480) KAKGLAIFSGPQFLIPEKHVPKPPGFKAA**T**KLQ**W**TP**L**SEDKV**T**GT**V**FEGLLD**R**YPLASPKLQGESEES**F**SASCVASG**Q**--PGED**A**PTDGAICSA**V**TP**E**EA

F1 K**K**PEAK**K**EA**K**PK**K**GG**K**GG**K**GG**K**PP-----G**K**GP**K**GG**K**GG**K**GG**K**PPK--K**G**EG**L**K**V**GG**K**DE**G**K-----TK**R**FF**W**DP**I**<sup>\*</sup>  
F2 APAAP**K**KK**K**AM**P**PP**P**PG**K**TPGD**A**SK-----AP**G**GP**P**GG**K**GA**P**PL**P**KG**K**KA**P**QL**G**KA**P**KA**G**GG**P**PK**A**-----DA**V**DP**M**TL**P**LR**R**K**I**H**W**KT**L**  
F3 SI**K**EP**K**GE**S**EP**P**H**G**VP**G**ASE**A**SA**K**SV**P**GE**G**RT**P**SA**A**S**Q**SG**S**A**A**SA**A**PE**A**KA**E**GA**K**EA**Q**ST**G**Q**C**L**F**SS**L**SA**E**DL**P**RE**M**ML**D**ASE**K**RE**T**AE**S**LR**R**EG**D**AA

F1 FEDE**I**PG**T**I**F**M**K**K-----PN**M**VL**K**LQ**D**VE**E**TF**A**K**V**VA**K**KT**E**S**K**PK-----II**Q**LL**P**DS**K**RAY**N**MS**I**AL**S**K**F**NN--YS**Y**Q**Q**LR**E**AI**D**LD**L**P  
F2 GK**E**Q**I**EG**T**V**F**KE**L**EG**D**PA**I**PD**M**FD**P**E**A**I**S**RL**F**S**A**T**L**TV**K**S**D**E**A**AV**K**AA**P**KA**E**E-----KK**H**T**L**DN**K**RA**Q**N**V**AI**V**LAR**L**P----LS**L**DA**I**A**Q**K**M**L**H**LD**T**  
F3 GA**E**GR**S**GD**P**PS**A**S**Q**K**R**PF**R**Y**R**LD**F**V**Q**LF**D**LF**Y**H**D**E**K**EL**Q**L**K**AK**S**SG**T**G**A**G**E**GG**P**PK**K**SG**V**LD**A**KA**T**Q**N**VE**I**CL**K**K**Y**KL**S**T**V**EE**F**K**A**LA**A**Q**I**DD**P**TT

F1 K**I**L**T**IE**A**TE**T**LL**N**F**V**PT**G**E**N**Q**V**V**K**E**I**NS**G**DL**K**LV**D**K--PE**Q**F**V**A**A**ML**G**VP**L**M**K**Q**R**LE**A**HA**F**AL**N**FR**E**AY**S**DA**Y**TP**L**EN**M**AD**A**CD**A**IDD--SQ**N**L**K**I  
F2 EGL**T**VD**I**LQ**K**VE**Q**VA**P**TE**E**LV**K**FR**E**YE**L**KK**T**ENT**G**DL**R**D**V**E**K**MT**A**L**I**P**V**TR**L**SS**R**VR**V**MQ**T**AL**Q**WE**K**V**V**EE**I**E**K**QL**A**LL**C**KA**A**DE**A**HN--SR**K**FR**S**  
F3 LA**I**DL**N**LA**E**NI**T**LY**W**PE**P**S**A**CE**A**L**K**AK**S**P**E**N**A**L**Q**L**P**L**A**D--Q**L**Y**F**TT**LL**N**Q**V**A**L**G**SE**K**LN**F**FL**Q**RR**A**VD**E**LE**S**SK**R**E**K**L**N**F**Y**CG**A**TE**L**LA**Q**TL**E**SD**A**FK**D**

F1 VL**F**AIL**E**LG**N**AL**N**E**G**-----DP**Q**RG**G**-----A**A**G**F**K**P**TT**L**AK**L**QE**I**RT**T**TK**P**VR**T**ML**Q**Y**I**CD--II**W**  
F2 LL**Q**AV**L**Q**W**GN**Y**V**N**H**G**V**K**K**A**P**K**Q**E**V**S**SE**S**E**A**R**K**AE**T**TS**P**TE**G**DR**R**EN**R**Q**T**L**Q**LP**P**ILL**V**KE**L**PT**K**G**F**KL**A**SE**K**L**M**E**F**RT**T**V**D**K**S**I**C**SL**H**F**I**IS**N**L**I**V**S**  
F3 LL**G**LV**V**RL**G**NC**V**NR**G**-----S**K**EG-----F**G**FK**L**K**D**F**V**Q**L**A**A**CT**S**K**D**R**S**T**N**LF**R**VI**Q**--TV**L**

F1 EQ**Q**PT**A**LN**I**Y**E**DL**K**IC**D**KA**Q**R**V**DM**Q**-----G**I**EG**R**IS**N**L**K**AG**L**TK**V**NT**L**E**A**AK-----K**G**NE**S**T**G**V**M**G**D**RD**P**--LR**N**IM**D**E**F**L**E**A**E**PK**I**Q**L**DD**F**LV  
F2 L**P**EL**D**IL**D**L**A**SD**M**PS**L**E**A**AR**L**S**D**E-----S**I**D**A**P**V**S**Y**LR**N**E**A**AF**L**LS**Q**I**H**AI**K**Q**V**LA**A**K**D**A**T**AT**D**PS**G**AP**R**PS**G**SK**P**Q**T**DE**A**L**H**E**L**TR**L**Q**L**H**G**EM**V**  
F3 EQ**N**PS**A**CD**E**MR**A**L**Q**D**V**DA**A**KA**I**DL**K**DL**Q**FG**D**IE**K**L**G**AW**A**K**Q**I**G**DR**R**SA**F**GG**A**AD**K**ME**K**W**I**ES**R**E**A**R**L**CE**L**L**K**KA**E**DA**E**T**L**Q**V**RL**R**GL**M**GL**T**K**A**DC**V**WP

F1 Q**V**Q**N**Q**L**F**Q**T**C**H-----Y**S**G-----Y**P**DK**D**V**K**K**I**K**P**DE**L**FK**Q**V**A**G-----  
F2 LT**L**ER**L**RE**S**Y**L**NC**K**AV**I**GE**V**GR**F**Y**G**ED**G**PK**K**P**S**AG**K**H**K**L**G**Q**A**V**S**VD**A**GS**A**T**A**GG**V**IA**E**W**E**FG**L**LD**Q**S**P**FE**L**LF**S**IL**S**T**C**R**Q**GL**R**D**V**Q**A**NP**R**K**Y**A**I**LL**V**  
F3 E**P**LR**W**FG**Q**F**Y**SH**F**E**A**IA**K**--E**Y**R**G**AK**D**R**D**R**Q**KA**E**RE**A**KK**N**D**V**LR**R**AT**T**IG-----AP**A**ISS**L**S-----

F1 --F**A**R**Q**VD**A**IR**K**Q**K**Q**E**I**A**D**R**E**L**K**R**K-----E**A**E**A**K**R**A**G**-----K**G**L**K**ST**A**V**K**K**V**G**M**K-----  
F2 GR**F**ASE**E**E**K**W**L**L**K**F**H**ID**N**SL**A**NR**R**K**V**TC**R**GS**D**AE**Q**V**A**GR**P**Q**D**AD**K**AG**S**SV**S**SR**P**RT**T**PR**G**S**I**AS**R**GG**K**KL**V**GR**H**GP**E**AG**G**TP**Q**I**P**RG**P**PK**S**DN----  
F3 --SE**K**PM**Q**GV**L**RP**A**GL**D**PS**L**AR**L**S--S-----A**T**Q**S**RF**P**G-----LL**S**PT**G**GG**G**GN**F**SG**V**GA**S**F**H**SS**P**LR**F**NT**Y**AN**H**SG**G**K

F1 -----  
F2 -GS**F**TT**E**T**Q**RL**G**R**L**SE**G**SE**D**AL**S**SP--  
F3 TGG**F**RS**P**SL**S**PG**A**AA**K**S**V**AR**V**RR**A**SE
