# Supplementary material
Source: PubMed Central journal article supplement (PMC3294449)
Supplement: supp_11.3.343_FigS2.pdf [file supp_11.3.343_FigS2.pdf]

**Figure S2**

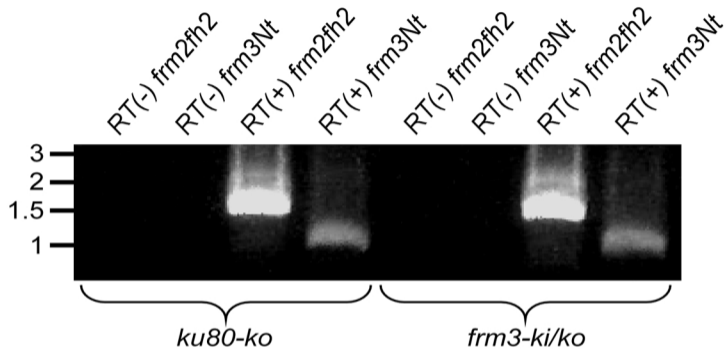

**Supplementary figure S2. *Tgfrm3* gene is expressed in tachyzoites.** Semi-quantitative RT-PCR analysis of transcript corresponding to *Tgfrm3* gene, performed with tachyzoite cDNA obtained from *ku80-ko* (*frm3* gene is using its own 3'utr) or from *frm3ki/ko* (*frm3* truncated gene is using the *SAG1* 3'utr) strains. To ensure that equal amounts of cDNA from each strain were being compared, the *frm2fh2* was used as an internal control and showed constant expression. The primers were designed to amplify 1 kb corresponding to the 5' coding sequence of the *frm3* open reading frame (Nt). The RT step was omitted in RT(-) controls. The amplification fragments were visualized on 1% agarose gel using ethidium bromide.
