# Supplementary material
Source: PubMed Central journal article supplement (PMC3294449)
Supplement: supp_11.3.343_FigS3.pdf [file supp_11.3.343_FigS3.pdf]

**Figure S3**

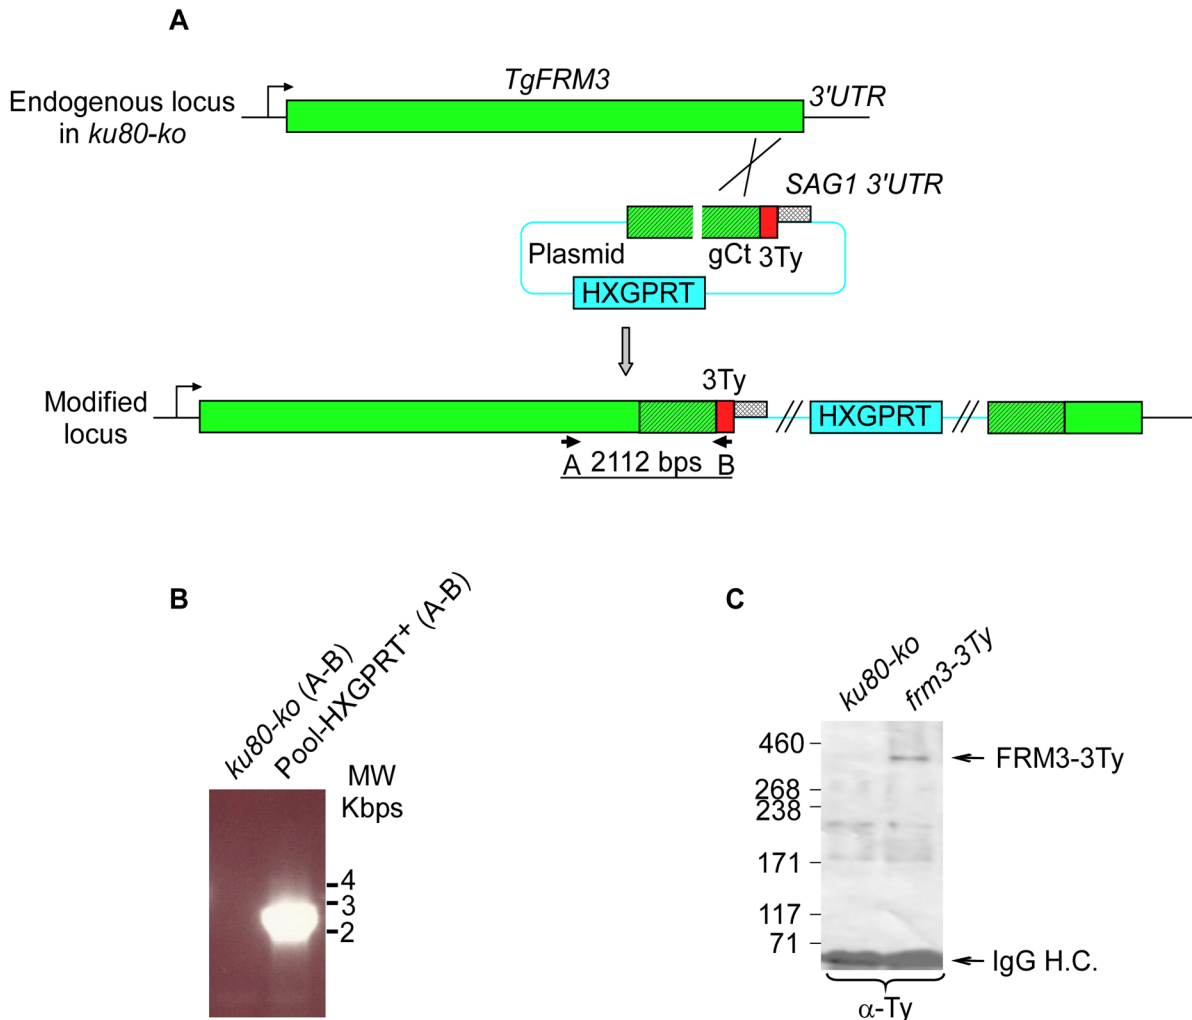

**Supplementary figure S3. Epitope tagging of *TgFRM3* by knock-in strategy**

(A) Insertion of three Ty epitope tags at the C-terminus of *TgFRM3* by single homologous recombination (knock-in in *ku80-ko* strain). The primers used for PCR analysis are indicated.

(B) PCR analysis performed on pool-HXGPRT<sup>+</sup>, showing that single homologous recombination occurred. Genomic DNA from *ku80-ko* parasites was used as negative control.

(C) The formin 3 protein is expressed in tachyzoites. The formin 3 protein was immunoprecipitated using mouse anti-Ty antibodies and resolved by western blot analysis. An extract of *ku80-ko* parasites was used as negative control for the *frm3-3Ty* pool of parasites. Samples were subjected to immunoblotting with the mAb anti-Ty antibodies. Heavy (HC) chains of the mouse immunoglobulins are detected with the mouse anti-Ty antibodies.
