# Supplementary material
Source: PubMed Central journal article supplement (PMC3294449)
Supplement: supp_11.3.343_TableS1.pdf [file supp_11.3.343_TableS1.pdf]

**Supplementary table S1: list of primers used in this study**

| Number | 5'→3' sequence                                        | Restriction site(s) | Plasmid/function<br>F (sense), R (antisense)              |
|--------|-------------------------------------------------------|---------------------|-----------------------------------------------------------|
| 1      | CCGGGTACCGATATCCGACGCAGCCGCGG                         | <i>KpnI</i>         | 2854- <i>TgFRM3ko</i> (F)                                 |
| 2      | GGCAAGCTTGCTTCTCCAGGCCGAG                             | <i>HindIII</i>      | 2854- <i>TgFRM3ko</i> (R)                                 |
| 3      | CCGGGATCCCGATGCCGGAGAGTTCGC                           | <i>BamHI</i>        | 2854- <i>TgFRM3ko</i> (F)                                 |
| 4      | GGCTCTAGAGATATCCGGCGCAGAACGGATGAAC                    | <i>XbaI</i>         | 2854- <i>TgFRM3ko</i> (R)                                 |
| 5      | ATGCATATGCCAGGCGCTGCATCTGAGCTG                        | <i>NsiI</i>         | DDmycHisFRM3 and<br>DDmycHisNtF3 (F)                      |
| 6      | TTAATTAACGACAGCGGCGTCTGCCGC                           | <i>PacI</i>         | DDmycHisFRM3 and<br>DDmycHisF3Ct (R)                      |
| 7      | CCATGGGAATGCATAAGGCGAAGGGCTTGCGA<br>TTTTTTCGG         | <i>NsiI, NcoI</i>   | DDmycHisF3, DDmycHisF3CT<br>and His-F3 (F)                |
| 8      | TTAATTAAGAATTCTCACTCAGAGGCGCGGCGG<br>ACCC             | <i>PacI, EcoRI</i>  | DDmycHisF3, DDmycHisNtF3<br>and His-F3 (R)                |
| 9      | atgcatATGGTGAGCAAGGGCGAGG                             | <i>NsiI</i>         | DDmycHismCherryFRM3 (F)                                   |
| 10     | atgcatCTGTACAGCTCGTCCATGCC                            | <i>NsiI</i>         | DDmycHismCherryFRM3 (R)                                   |
| 11     | TACTTCCAATCCAATTTAATGCcgcctgct<br>ctctgcttgacataacc   | -                   | MP18/ISP3-YFP (F)                                         |
| 12     | tcctccacttccaattttageGTTTCTGTCGTTGCTTGCT<br>GAAGACTTG | -                   | MP18/ISP3-YFP (R)                                         |
| 13     | CCATGGGAAAGAAGAAGTCGGGGGTGCTGGAC                      | <i>NcoI</i>         | His-truncatedF3 (F)                                       |
| 14     | GAATTCTCACGGGCCCGCCCTCGCCCGC                          | <i>EcoRI</i>        | His-truncatedF3 (R)                                       |
| 15     | CCGGGTACCGACGAAGGCCCTCCGGG                            | <i>KpnI</i>         | <i>TgFRM3-ki</i> (F)                                      |
| 16     | GGCATGCATGGACAGCGGCGTCTGCCG                           | <i>NsiI</i>         | <i>TgFRM3-ki</i> (R)                                      |
| 17     | CCGGGTACCGCTGTCCGGGCCCTCTG                            | <i>KpnI</i>         | <i>TgFRM3-ki/ko</i> (F)                                   |
| 18     | GGCATGCATCACCCGAAGCACCCGAAGCAGCG                      | <i>NsiI</i>         | <i>TgFRM3-ki/ko</i> (R)                                   |
| 19     | CCCCTCTCTCGCCACCCC                                    | -                   | Genomic PCR <i>TgFRM3ko</i> (F)                           |
| 20     | GCCGACAGGACGCTACTGG                                   | -                   | Genomic PCR <i>TgFRM3ko</i> (R)                           |
| 21     | CCGTAGTCTTCAATGGGTTTGGACGC                            | -                   | Genomic PCR <i>TgFRM3ko</i> (R)                           |
| 22     | CAGTGACACCGCGGTGGAGG                                  | -                   | Genomic PCR <i>TgFRM3ko</i> (F)                           |
| 23     | CCCACGACAGCAGACAACTTCCCTC                             | -                   | Genomic PCR <i>TgFRM3ko</i> (F)                           |
| 24     | GGTCCGCGCCATAATCTTTCCCC                               | -                   | Genomic PCR <i>TgFRM3ko</i> (R)                           |
| 25     | ATGCATGCCGGGAAGTCAGCGGAGGG                            | -                   | Genomic PCR <i>TgFRM3ko</i><br>and <i>TgFRM3ki</i> (F)    |
| 26     | ATGCATCGACAGCGGCGTCTGCCGATTC                          | -                   | Genomic PCR <i>TgFRM3ko</i> (R)                           |
| 27     | GTGGAAGTATCGCCTCAAGAGG                                | -                   | Genomic PCR <i>TgFRM3ko</i> (F)                           |
| 28     | CGGCGGAGGAAGCCACG                                     | -                   | Genomic PCR <i>TgFRM3ko</i> (R)                           |
| 29     | CTGCAGGATCGAGCGGGTCTGGTTTCG                           | -                   | Genomic PCR <i>TgFRM3ki</i><br>and <i>TgFRM3ki/ko</i> (R) |
| 30     | GAGGCCGGGGCCTCTCAG                                    | -                   | Genomic PCR<br><i>TgFRM3ki/ko</i> (F)                     |
